# Supplementary material
Source: PubMed Central journal article supplement (PMC7268948)
Supplement: UEG913368_Supplemental_Material.pdf [file UEG913368_Supplemental_Material.pdf]

**Supplementary Table (6) – Comparison between capsule score values at baseline and 6 months**

|        | LS baseline | LS 6 months | PCCS-SB- baseline | PCCS-SB- 6 months | PCC baseline | PCC-6 months |
|--------|-------------|-------------|-------------------|-------------------|--------------|--------------|
| Median | 225         | 225         | 4                 | 5                 | 5            | 5            |
| IQR    | 135-600     | 158 -287    | 2-12              | 2-8               | 4-12         | 2-8          |
| p      | 0.7         |             | 0.9               |                   | 0.3          |              |

IQR- interquartile range; LS-Lewis score; PCC-SB- panenteric capsule small bowel score; PCCS- panenteric capsule score; p- for Wilcoxon signed rank test
